# Supplementary material
Source: HighWire-hosted journal article supplement (https://genome.cshlp.org/content/suppl/2002/07/31/12.8.1159)

**Supplementary Information:** Proportion of proteins predicted from complete bacterial genomes that share highest similarity to eukaryotic proteins, according to a different BAE-watch stringency level (Figure 1 is based on a Step Ratio of 10, while this graph below is based on a Step Ratio of 30 - see the Methods for a description of the Step Ratio).

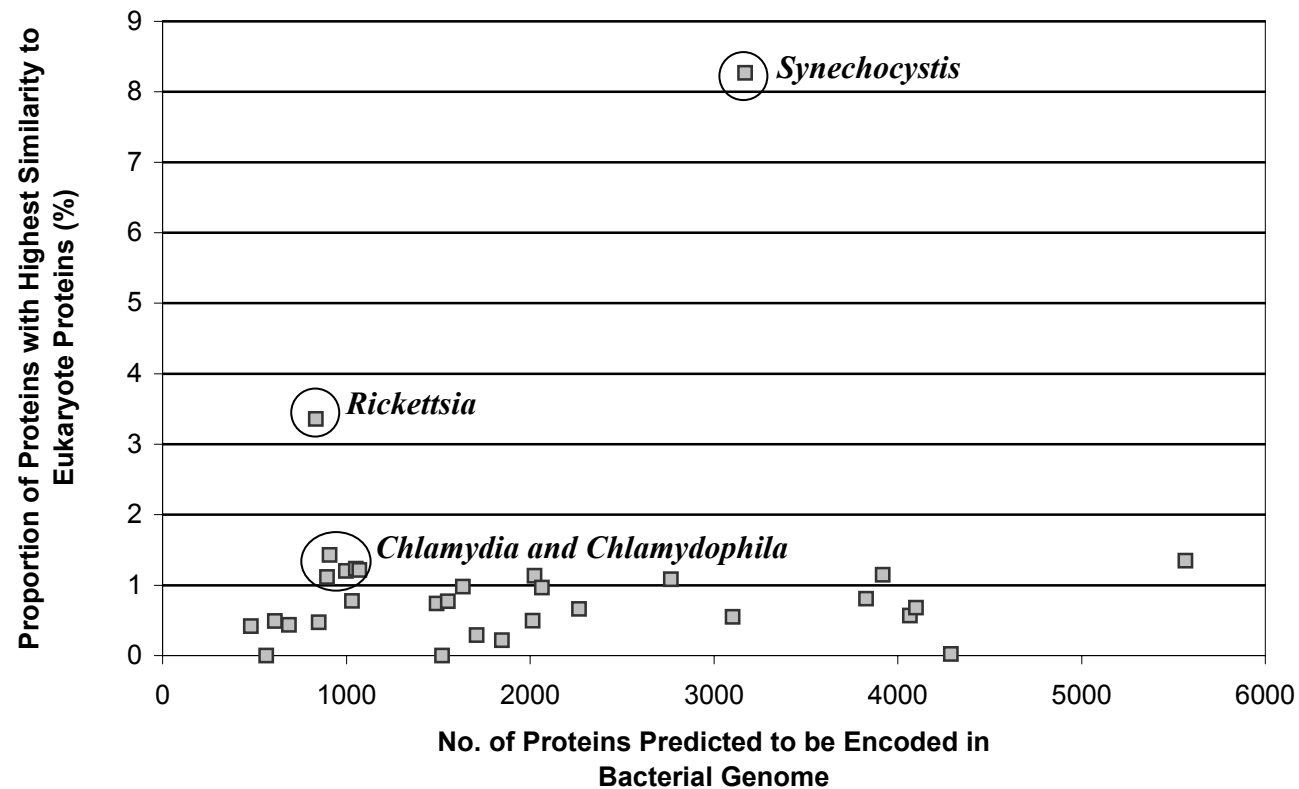

Supplement: Brinkman_Supp.pdf [file Brinkman_Supp.pdf]
